# Supplementary material for: Performance in mortality prediction of SAPS 3 And MPM-III scores among adult patients admitted to the ICU of a private tertiary referral hospital in Tanzania: a retrospective cohort study
Source: PeerJ. 2021 Nov 16;9:e12332. doi: 10.7717/peerj.12332 (PMC8603815; doi:10.7717/peerj.12332)
Supplement: Supplemental Information 1 [file peerj-09-12332-s001.xlsx]

## Sheet: Sheet1
MR#	SEX	AGE	ETHNICITY	COMORBID	DIAGNOSIS - CATEGORY	ADMITTED FROM	DIAGNOSIS	SAPS 3	SAPS- MORT.RISK%	MPM 3	MPM 3 -MORT.Risk%	OUTCOME	CODE STATUS	LOS ICU (D)	HOSP- LOS (D)	SUPPORT IN 1st HR :- MV , RR, INOTROPES	LOCATION BEFORE ICU ADMISSION	SURGERY DONE
013-54-51	M	77	ASIAN	DM,HTN,COPD,HF	RESPIRATORY	EMERGENCY	COPD Exacerbation	43	0.1	4	0.1747	Survived	DNR	6	9	NIV	Home
015-29-60	F	67	AFRICAN	HTN	NEUROLOGY	EMERGENCY	CVA- hemorrhagic	39	0.02	5	0.0405	Survived	Full Code	11	19	None	Hospital
155-87-67	F	59	ASIAN	EPILESPY,DM,HTN	RESPIRATORY	EMERGENCY	Aspiration Pneumonia	48	0.09	6	0.0952	Survived	DNR	2	9	NIV	Home
055-49-61	M	71	AFRICAN	DM,HTN, Liver Cirhosis	GASTROENTEROLOGY	EMERGENCY	Esophageal Varices	42	0.02	7	0.0209	Survived	Full code	5	8	None	Home
155-95-61	M	58	ASIAN	DM,HTN	NEUROLOGY	EMERGENCY	CVA- haemorrhagic, AKI	41	0.06	6	0.0647	Survived	Full code	3	4	MECHNAICAL VENTILATION	Hospital
038-97-95	M	60	ASIAN	HIV, LIVER CIRHOSIS	GASTROENTEROLOGY	EMERGENCY	Acute liver failure	56	0.83	7	0.4415	Death	Full code	14	19	None	Hospital
054-99-94	M	53	AFRICAN	HTN	NEUROLOGY	EMERGENCY	CVA - Hemorrhagic	57	0.05	5	0.0603	Survived	Full code	1	2	None	Hospital
054-81-53	M	63	ASIAN	DM,HTN	NEUROLOGY	EMERGENCY	CVA - Ischemic	32	0.01	4	0.0154	Survived	Full code	3	4	None	Home
155-95-98	M	45	ASIAN	NONE	SURGERY	EMERGENCY	Poly trauma	31	0.01	4	0.0078	Survived	Full Code	13	16	None	Home
007-17-93	M	67	AFRICAN	HTN,CKD	SURGERY	EMERGENCY	Septic shock - Gangrene	49	0.02	4	0.018	Survived	Full Code	2	3	INOTROPES	Home
052-10-47	M	73	AFRICAN	HTN,CKD,HF	NEPHROLOGY	CLINIC	AKI on CKD	31	0.08	3	0.0805	Survived	Full Code	3	1	None	Home
049-55-33	F	30	AFRICAN	NONE	OBSTETRICS & GYNECOLOGY	CLINIC	Post Partum Hemorrhage	21	0.01	2	0.44	Survived	Full Code	4	6	None	Home
036-14-20	F	82	ASIAN	DM,HTN,CKD,COPD,HF	CARDIOLOGY	EMERGENCY	CCF With anemia	45	0.17	2	0.3204	Death	DNR	6	16	None	Home
155-98-25	M	46	AFRICAN	NONE	SURGERY	EMERGENCY	Intestinal obstruction	20	0.01	2	0.03	Survived	Full Code	8	11	None	Home	Appendectomy
156-00-02	F	26	AFRICAN	NONE	OBSTETRICS & GYNECOLOGY	WARD	Septic abortion	25	0.01	2	0.0141	Survived	Full Code	5	6	None	Home	Abd Hysterectomy
155-93-10	M	41	ASIAN	NONE	INFECTIOUS	EMERGENCY	Severe Malaria	47	0.32	5	0.2881	Survived	Full Code	23	24	INOTROPES,MECHANICAL VENTILATION,HEMODIALYSIS	Home
054-99-59	M	56	AFRICAN	DM,HTN,CKD	NEPHROLOGY	EMERGENCY	AKI on CKD	35	0.05	2	0.0723	Survived	Full Code	4	6	HEMODIALYSIS	Home
047-78-50	F	74	AFRICAN	HTN	NEUROLOGY	EMERGENCY	Spine denegeration disease	46	0.17	2	0.0834	Survived	Full Code	4	6	None	Home
048-13-37	F	75	AFRICAN	DM,PACREATIC CA	RESPIRATORY	EMERGENCY	Pulmonary embolism	65	0.11	3	0.303	Survived	DNR	2	6	None	Home
037-48-79	M	63	CAUCASIAN	HTN	NEUROLOGY	EMERGENCY	CVA - Ischemic	32	0.05	2	0.08	Survived	Full Code	4	6	None	Home
047-13-73	M	60	ASIAN	HTN,HF	SURGERY	EMERGENCY	Acute cholecystitis	51	0.17	3	0.23	Survived	DNR	11	12	INOTROPES	Home	Cholestectomy
037-21-08-	M	62	AFRICAN	HTN	NEUROLOGY	EMERGENCY	CVA - Hemorrhagic	66	0.38	5	0.8263	Death	DNR	9	10	MECHNAICAL VENTILATION	Home	EVD insertion
053-88-77	M	76	AFRICAN	PROSTATE CA,HTN,LIVER CA	ONCOLOGY	EMERGENCY	Disseminated Prostate CA	48	0.34	5	0.2271	Death	Full Code	7	8	INOTROPES,MECHANICAL VENTILATION	Home
156-05-13	M	43	AFRICAN	HTN	NEUROLOGY	EMERGENCY	CVA - Hemorrhagic	48	0.24	4	0.0784	Survived	Full Code	21	22	INOTROPES,MECHANICAL VENTILATION	Home	EVD insertion
051-15-73	M	58	ASIAN	HTN	NEUROLOGY	CLINIC	Cervical Myelopathy	26	0.09	2	0.0468	Survived	Full Code	5	12	None	Home	Cord decompression
081-89-52	M	27	AFRICAN	HIV	GASTROENTEROLOGY	EMERGENCY	Anemia 2 Lower GI bleeding	29	0.01	5	0.113	Survived	Full Code	2	4	None	Home
019-58-75	M	64	AFRICAN	HTN	SURGERY	CLINIC	Toxic Multinodular goitre	26	0.01	2	0.0583	Survived	Full Code	4	5	None	Home	Total Thyroidectomy
007-17-93	M	67	AFRICAN	HTN,HF,CKD,PVD	SURGERY	WARD	Septick shock - Foot Gangrene	36	0.01	3	0.1065	Survived	Full Code	4	6	INOTROPES,HEMODIALYSIS	Home	Below knee Amputation
105-91-80	M	42	AFRICAN	DM	SURGERY	EMERGENCY	DKA	23	0.01	2	0.0258	Survived	Full code	3	4	None	Home
156-03-14	M	70	AFRICAN	NONE	CARDIOLOGY	EMERGENCY	Acute decompansated HF	31	0.08	2	0.0724	Survived	Full Code	4	4	INOTROPES	Home
049-77-16	M	52	AFRICAN	DM, HTN	CARDIOLOGY	EMERGENCY	Acute decompansated HF	32	0.01	2	0.0375	Survived	Full Code	3	3	INOTROPES	Home
046-03-26	M	76	ASIAN	COPD	RESPIRATORY	EMERGENCY	COPD Exacerbation	44	0.08	3	0.1827	Survived	Full Code	6	8	NIV	Home
52-22-07	M	65	AFRICAN	HTN	NEUROLOGY	EMERGENCY	CVA - Ischemic	31	0.02	3	0.0884	Survived	Full Code	5	7	None	Home
054-16-20	M	73	ASIAN	HTN, DM	CARDIOLOGY	EMERGENCY	Acute decompansated HF	49	0.38	4	0.2584	Survived	Full Code	4	6	None	Home
054-92-83	F	67	AFRICAN	NONE	SEPSIS	EMERGENCY	Septic shock - LL Celluliits	25	0.01	3	0.065	Survived	Full Code	4	6	INOTROPES	Home
046-67-64	M	50	AFRICAN	DM,HIV,EPILEPSY,HYPOTHYROIDISM	NEUROLOGY	EMERGENCY	Status epilepticus	22	0.01	2	0.0348	Survived	Full Code	2	4	None	Home
009-40-58	M	73	AFRICAN	HTN,HF,CVA	CARDIOLOGY	EMERGENCY	Aspiration Pneumonia	80	0.81	6	0.8774	Death	DNR	32	32	NIV	Home
015-40-58	M	67	AFRICAN	DM,HTN	NEUROLOGY	EMERGENCY	CVA - Hemorrhagic	50	0.07	5	0.1774	Survived	Full Code	5	20	None	Home
156-0-38	F	58	AFRICAN	HTN	ENDOCRINOLOGY	EMERGENCY	HHS	36	0.02	3	0.0468	Survived	Full Code	4	5	None	Home
020-67-52	F	46	AFRICAN	SCD	HEMATOLOGY	EMERGENCY	Sickle cell painful crisis	29	0.01	2	0.03	Survived	Full Code	3	4	None	Home
140-18-49	F	48	AFRICAN	DM,HTN	SURGERY	EMERGENCY	Septic shock - Diabetic foot ulcer	28	0.02	2	0.0323	Survived	Full Code	6	12	INOTROPES	Hospital	Surgical Debridement
048-35-98	M	35	AFRICAN	Liver Cirhosis	GASTROENTEROLOGY	EMERGENCY	Esophageal varices	44	0.09	4	0.0584	Survived	Full Code	1	2	None	Home
012-83-98	F	88	ASIAN	DM,HTN,HF,HYPOTHYROIDISM	SEPSIS	EMERGENCY	Septick Shock - Urine	35	0.04	3	0.122	Survived	Full Code	1	3	INOTROPES	Home
041-86-56	M	52	AFRICAN	DM,HTN,HIV,LYMPHOMA	ONCOLOGY	EMERGENCY	Lung metastasis	52	0.09	3	0.1471	Survived	Full Code	2	6	None	Home
092-56-94	F	36	AFRICAN	NONE	NEUROLOGY	EMERGENCY	CVA - Hemorrhagic	35	0.04	4	0.0307	Survived	Full Code	17	17	None	Home
156-16-12	M	39	ASIAN	NONE	NEUROLOGY	EMERGENCY	Severe TBI	55	0.48	5	0.7661	Death	DNR	4	4	INOTROPES,MECHANICAL VENTILATION	Home
045-10-11	F	82	ASIAN	DM,HTN	RESPIRATORY	EMERGENCY	Pneumonia with Electrolyte imbalance	46	0.16	2	0.3894	Survived	DNR	1	3	None	Home
040-89-12	M	32	ASIAN	NONE	SURGERY	EMERGENCY	Duodenal ulcer with acute hemorrhage	23	0	3	0.015	Survived	Full Code	1	2	None	Home
156-12-12	F	47	AFRICAN	HIV,PTB,DVT	INFECTIOUS	CLINIC	HIV associated Anemia	55	0.17	7	0.617	Death	Full Code	1	5	INOTROPES,MECHANICAL VENTILATION	Home
099-86-66	M	55	AFRICAN	HTN	NEUROLOGY	EMERGENCY	CVA - Hemorrhagic (SAH)	45	0.17	3	0.0619	Survived	Full Code	15	15	None	Home	Burr hole + EVD insertion
043-03-63	M	44	AFRICAN	HTN	CARDIOLOGY	EMERGENCY	Hypertensive emergency	32	0.01	2	0.0278	Survived	Full Code	2	3	None	Home
156-15-61	F	68	AFRICAN	DM,HTN	NEUROLOGY	EMERGENCY	CVA - Hemorrhagic (SAH)	43	0.06	4	0.1805	Survived	Full Code	1	2	None	Home
020-59-58	F	73	ASIAN	DM,HTN,HF,CAD, Chronic A Fib	NEUROLOGY	EMERGENCY	CVA - Hemorrhagic	68	0.69	7	0.8632	Death	Full Code	5	5	Mechanical ventilation	Home	Burr hole + EVD insertion
012-92-77	M	86	ASIAN	DM,HTN,HF,STROKE,CAD, A Fib	SEPSIS	EMERGENCY	Septick Shock - Urine	60	0.19	3	0.2511	Survived	Full Code	3	3	INOTROPES	Home
156-15-72	F	69	ASIAN	DM,HTN,HF,CAD, A Fib,PARKINSONS,EPILEPSY	NEUROLOGY	EMERGENCY	Status epilepticus	35	0.01	3	0.1483	Survived	Full Code	9	10	None	Home
156-22-09	F	31	CAUCASIAN	NONE	NEUROLOGY	EMERGENCY	Severe TBI	41	0.05	4	0.0255	Survived	Full Code	8	10	None	Hospital
156-22-08	F	61	CAUCASIAN	HTN	SURGERY	EMERGENCY	Polytrauma	20	0.01	2	0.0523	Survived	Full Code	5	8	None	Hospital
066-97-05	M	68	AFRICAN	DM,HTN,CKD,BPH,HF	NEUROLOGY	EMERGENCY	CVA - Ischemic	51	0.08	4	0.2239	Survived	Full Code	1	3	None	Home
049-10-40	F	76	AFRICAN	DM,HTN,HF,CKD	NEPHROLOGY	EMERGENCY	AKI on CKD	50	0.2	5	0.2918	Survived	DNR	14	18	NIV,HEMODIALYSIS	Home
156-24-30	M	19	AFRICAN	ASTHMA	INFECTIOUS	EMERGENCY	Septic Shock - Severe Malaria	21	0.01	3	0.0247	Survived	Full Code	3	4	INOTROPES	Home
053-78-19	M	83	ASIAN	HTN	SEPSIS	EMERGENCY	Septic Shock - Urine	37	0.02	3	0.23	Survived	Full Code	6	12	INOTROPES	Home
008-59-99	F	78	ASIAN	ASTHMA,HTN,HF,HPOTHYROIDISM, A Fib	SEPSIS	EMERGENCY	Septic Shock - CAP	62	0.24	5	0.6853	Death	Full Code	8	8	INOTROPES,MECHANICAL VENTILATION,HEMODIALYSIS	Home
156-31-29	F	67	AFRICAN	HTN,DVT	RESPIRATORY	EMERGENCY	Pulmonary embolism	56	0.1	3	0.1388	Survived	Full Code	4	5	None	Home
156-30-48	M	81	AFRICAN	HTN,HF	INFECTIOUS	EMERGENCY	Septic Shock - CAP	60	0.17	4	0.1067	Survived	Full Code	19	20	INOTROPES,MECHANICAL VENTILATION	Home
156-39-75	M	46	AFRICAN	DM	ENDOCRINOLOGY	EMERGENCY	DKA	36	0.03	3	0.03	Survived	Full Code	17	20	INOTROPES,MECHANICAL VENTILATION	Home
156-38-07	M	85	ASIAN	HTN, CKD, COPD	RESPIRATORY	EMERGENCY	COPD-Exacerbation	44	0.1926	3	0.1	Survived	Full Code	4	7	NIV	Home
052-68-10	M	70	AFRICAN	MET CHOLANGIOCARCINOMA, DM	GASTROENTEROLOGY	EMERGENCY	Biliary duct obstruction	44	0.52	6	0.5556	Death	Full Code	20	20	INOTROPES,MECHANICAL VENTILATION	Home	ERCP
055-37-27	M	55	AFRICAN	HTN, LIVER CIRHOSIS	GASTROENTEROLOGY	EMERGENCY	Acute liver failure	36	0.09	5	0.0918	Survived	Full Code	4	5	none	Home
041-75-84	M	82	ASIAN	HTN, DM, COPD	NEUROLOGY	EMERGENCY	CVA - Ischemic	39	0.05	4	0.0619	Survived	Full Code	4	6	None	Home
156-29-99	M	64	ASIAN	NONE	INFECTIOUS	EMERGENCY	Septic Shock - Severe Malaria	27	0.06	2	0.0583	Survived	Full Code	3	5	INOTROPES	Home
049-03-17	M	76	ASIAN	HTN, DM	NEPHROLOGY	EMERGENCY	AKI ON CKD	38	0.09	3	0.1443	Survived	Full Code	2	5	HEMODIALYSIS	Home
035-15-00	M	46	ASIAN	NONE	GASTROENTEROLOGY	EMERGENCY	Hepatic Encephalopathy	41	0.45	5	0.5006	Survived	Full Code	3	4	INOTROPES	Home
055-05-14	M	53	AFRICAN	HTN	NEPHROLOGY	EMERGENCY	Uremic encephalopathy	38	0.06	4	0.0653	Survived	Full Code	2	3	HEMODIALYSIS	Home
156-61-89	F	34	AFRICAN	NONE	OBGYN	WARD	Post Partum Hemorrhage	35	0.01	3	0.0585	Survived	Full Code	2	7	INOTROPES	Home
059-60-15	F	25	AFRICAN	ASTHMA	RESPIRATORY	EMERGENCY	Acute asthma exacerbation	20	0.01	2	0.0136	Survived	Full Code	4	5	None	Home
156-52-89	F	46	AFRICAN	HTN	RESPIRATORY	EMERGENCY	Pulmonary embolism	23	0.02	2	0.03	Survived	Full Code	6	7	None	Home
054-63-83	M	86	AFRICAN	HTN	CARDIOLOGY	EMERGENCY	Acute decompansated HF	40	0.24	2	0.1263	Survived	Full Code	3	5	None	Home
014-43-88	M	58	ASIAN	HTN, DM	CARDIOLOGY	EMERGENCY	Acute Coronary Syndrome	56	0.79	5	0.8115	Death	Full Code	1	1	INOTROPES,MECHANICAL VENTILATION	Home
156-45-90	F	78	AFRICAN	HTN, DM	CARDIOLOGY	EMERGENCY	Severe Pulmonary HTN Sec to Mitral stenosis	40	0.06	2	0.096	Survived	Full Code	4	6	None	Home
046-27-53	F	38	AFRICAN	NONE	OBGYN	WARD	Peripartum Cardiomyopathy	35	0.01	2	0.0222	Survived	Full Code	4	6	None	Home
156-42-63	F	52	ASIAN	NONE	INFECTIOUS	EMERGENCY	Severe Malaria	29	0.02	2	0.0375	Survived	Full Code	4	5	None	Home
035-28-63	M	45	AFRICAN	HTN	NEUROLOGY	EMERGENCY	Hypertensive encephalopathy	36	0.01	2	0.0289	Survived	Full Code	2	2	None	Home
156-30-48	M	81	AFRICAN	HTN, HF	CARDIOLOGY	EMERGENCY	Acute decompansated HF	36	0.08	2	0.2033	Survived	Full Code	8	15	None	Home
069-99-38	M	27	AFRICAN	NONE	GASTROENTEROLOGY	EMERGENCY	Upper GI Bleeding	32	0.01	2	0.0586	Survived	Full Code	2	4	None	Home
155-34-04	M	45	AFRICAN	HTN	GASTROENTEROLOGY	EMERGENCY	Upper GI Bleeding	37	0.01	2	0.0792	Survived	Full Code	3	5	None	Home
156-65-07	F	67	ASIAN	HTN,HF,HYPOTHYROIDISM	RESPIRATORY	EMERGENCY	Acute Pulmonary edema	52	0.26	3	0.065	Survived	Full Code	23	30	INOTROPES,MECHANICAL VENTILATION	Home
156-60-79	M	41	ASIAN	HTN	NEUROLOGY	EMERGENCY	Severe TBI	39	0.28	5	0.2184	Survived	Full Code	19	22	MECHNAICAL VENTILATION	Home
156-67-78	M	51	AFRICAN	HTN	NEUROLOGY	EMERGENCY	CVA - Hemorraghic	44	0.13	4	0.1323	Survived	Full Code	8	10	None	Home
015-16-90	M	75	ASIAN	DM,HTN,HF,STROKE, Chronic A Fib	SEPSIS	EMERGENCY	Septic shock - Urine	69	0.44	4	0.6376	Death	DNR	13	13	INOTROPES	Home
010-89-89	M	66	AFRICAN	DM,HTN	NEUROLOGY	EMERGENCY	CVA - Ischemic	49	0.16	5	0.3286	Survived	Full Code	2	2	None	Home
156-56-93	M	63	AFRICAN	DM,HTN,STROKE	SURGERY	EMERGENCY	Severe sepsis - Diabetic Foot Ulcer	37	0.04	2	0.0562	Survived	Full Code	9	12	None	Home	BKA 2 DFU, SACRAL SORE DEBRIDEMENT
003-77-94	M	40	AFRICAN	Liver Cirhosis	GASTROENTEROLOGY	EMERGENCY	Bleeding Esophageal Varices	23	0.02	3	0.0204	Survived	Full Code	4	4	None	Home
156-56-20	M	39	ASIAN	NONE	INFECTIOUS	EMERGENCY	Severe Malaria	28	0.01	3	0.0231	Survived	Full Code	7	7	INOTROPES	Home
013-02-76	F	78	ASIAN	DM,HTN, COPD	RESPIRATORY	EMERGENCY	COPD Exacerbation	43	0.02	3	0.096	Survived	Full Code	9	10	MECHANICAL VENTILATION	Home
018-95-70	M	76	AFRICAN	HTN	NEUROLOGY	EMERGENCY	CVA - Hemorraghic	52	0.11	4	0.2076	Survived	Full Code	5	13	None	Home
048-88-05	M	42	ASIAN	HTN	SURGERY	EMERGENCY	Blunt Chest Trauma	25	0.01	2	0.0239	Survived	Full Code	2	4	None	Home
156-69-11	M	63	CAUCASIAN	NONE	INFECTIOUS	EMERGENCY	Septic Shock - Severe Malaria	51	0.19	3	0.1214	Survived	Full code	3	9	INOTROPES,HEMODIALYSIS	Home
156-60-81	M	26	ASIAN	DM	SURGERY	EMERGENCY	Septic shock - Diabetic foot ulcer	28	0.01	2	0.0131	Survived	Full code	6	10	None	Home	Surgical Debridement
038-83-07	M	72	ASIAN	DM,HTN,HF,CKD,PARKISONISM	NEPHROLOGY	EMERGENCY	Septick Shock - Urine	61	0.34	6	0.4265	Death	DNR	11	11	INOTROPES	Home
156-62-36	M	49	ASIAN	NONE	SURGERY	EMERGENCY	Right leg fracture with soft injuries on the neck and face	20	0.01	2	0.0335	Survived	Full code	3	9	None	Home
156-38-46	F	78	ASIAN	DM,HTN,CAD	ENDOCRINOLOGY	EMERGENCY	DKA	39	0.05	2	0.096	Survived	Full code	2	5	None	Home
156-69-50	F	38	ASIAN	SICKLE CELL DISEASE	HEMATOLOGY	EMERGENCY	Acute chest syndrome	24	0.01	2	0.0222	Survived	Full code	3	6	None	Hospital	C/S with BTL
053-39-36	M	67	ASIAN	DM,HTN,CKD,HYPOTHYROIDISM	CARDIOLOGY	EMERGENCY	Acute decompansated HF	42	0.06	4	0.2166	Survived	Full Code	8	10	HEMODIALYSIS	Home
042-37-43	F	69	ASIAN	DM,HTN,HF,CKD,HYPOTHYROIDISM,A Fib	CARDIOLOGY	EMERGENCY	Acute decompansated HF	32	0.01	3	0.0782	Survived	Full Code	4	4	HEMODIALYSIS	Home
037-03-56	M	71	ASIAN	CLD,COPD,HYPOTHYROIDISM	GASTROENTEROLOGY	CLINIC	Acute liver failure	60	0.07	4	0.2515	Survived	Full Code	5	5	INOTROPES	Home
052-68-10	M	68	AFRICAN	CHOLANGIOCARCINOMA	ONCOLOGY	EMERGENCY	Intestinal obstruction 2 mets	59	0.57	4	0.3906	Death	DNR	14	15	HEMODIALYSIS	Home
013-11-10	F	62	AFRICAN	DM,HTN,HF,HYPOTHYROIDISM	SURGERY	CLINIC	Cellulitis	32	0.06	2	0.1096	Survived	Full Code	2	5	None	Home
038-50-23	M	87	AFRICAN	HTN,CKD	ONCOLOGY	WARD	Multiple myeloma	70	0.86	6	0.442	Death	Full Code	14	21	INOTROPES,MECHANICAL VENTILATION,HEMODIALYSIS	Home
155-50-02	F	68	ASIAN	DM,HTN	SURGERY	EMERGENCY	Right hip dislocation	26	0.03	3	0.1435	Survived	Full Code	4	7	None	Home
041-05-55	M	64	ASIAN	DM,HTN,CAD,HF	ENDOCRINOLOGY	EMERGENCY	Anticholinergic overdose	32	0.04	4	0.1173	Survived	Full Code	2	4	Inotropes	Home
156-54-75	M	47	ASIAN	NONE	NEUROLOGY	EMERGENCY	Mild TBI	34	0.04	3	0.0849	Survived	Full Code	9	21	None	Home
156-56-01	M	46	ASIAN	DM,HTN,Liver Cirhosis	GASTROENTEROLOGY	EMERGENCY	Esophageal varices	44	0.08	4	0.0669	Survived	Full Code	1	3	None	Home
012-92-77	M	76	ASIAN	DM,HTN,STROKE,PARKISONISM	NEUROLOGY	EMERGENCY	Status epilepticus	27	0.02	3	0.1207	Survived	Full Code	11	12	None	Home
054-69-70	F	45	AFRICAN	NONE	SURGERY	EMERGENCY	Cellulitis	32	0.02	2	0.0278	Survived	Full Code	3	7	None	Home
156-46-36	M	32	ASIAN	NONE	NEUROLOGY	EMERGENCY	Quadriplegia 2 Gunshot	41	0.17	4	0.0938	Survived	Full Code	38	127	INOTROPES,MECHANICAL VENTILATION	Home
043-28-10	F	77	ASIAN	DM,HTN	INFECTIOUS	EMERGENCY	Severe Pneumonia	36	0.02	2	0.0604	Survived	Full Code	2	2	None	Home
050-93-09	M	24	AFRICAN	NONE	INFECTIOUS	EMERGENCY	Severe Pneumonia	24	0	2	0.0131	Survived	Full Code	4	4	None	Home
042-52-59	F	39	AFRICAN	NONE	OBGYN	WARD	Peripartum Cardiomyopathy	27	0	2	0.0231	Survived	Full Code	1	3	None	Home
122-49-68	F	27	AFRICAN	NONE	OBGYN	WARD	Post Partum Hemorrhage	31	0.12	5	0.7076	Death	Full Code	2	3	INOTROPES,MECHANICAL VENTILATION,HEMODIALYSIS	Home
017-36-38	F	78	ASIAN	Chronic A Fib	INFECTIOUS	EMERGENCY	Septic shock	56	0.5	6	0.8426	Death	Full Code	3	3	INOTROPES,MECHANICAL VENTILATION	Home
076-14-79	M	31	AFRICAN	SICKLE CELL DISEASE	HEMATOLOGY	EMERGENCY	Acute chest syndrome	42	0.05	3	0.017	Survived	Full Code	11	14	NIV	Home
156-86-54	M	64	AFRICAN	PULMONARY HTN	RESPIRATORY	CLINIC	Severe Pneumonia	62	0.32	4	0.2461	Survived	Full Code	9	11	NIV	Home
156-73-68	M	60	AFRICAN	DM,HTN,CKD	NEPHROLOGY	EMERGENCY	DVT of the left 2 chronic graft rejection	42	0.26	4	0.3604	Death	DNR	6	10	HEMODIALYSIS	Home
156-81-67	M	50	AFRICAN	DM,HTN,STROKE	NEUROLOGY	EMERGENCY	HTN urgency	59	0.8	6	0.8739	Death	DNR	27	27	None	Home	Burr hole + EVD insertion
020-61-77	F	91	ASIAN	EPILESPY,OSTEOPOROSIS	SURGERY	EMERGENCY	Septic Perineal ulcer	51	0.28	1	0.4502	Survived	DNR	13	15	None	Home	Surgical Debridement
007-63-38	F	42	AFRICAN	NONE	SURGERY	EMERGENCY	Pelvic fracture	25	0.01	2	0.0249	Survived	Full code	1	1	None	Home	External fixation of the pelvis
156-84-79	M	70	CAUCASIAN	HTN,COPD	RESPIRATORY	EMERGENCY	Severe Pneumonia	46	0.1	3	0.1435	Survived	Full Code	7	16	None	Home
156-80-75	M	40	CAUCASIAN	NONE	INFECTIOUS	EMERGENCY	Dengue fever with severe thrombocytopenia	38	0.03	2	0.0222	Survived	Full Code	1	2	None	Hospital
099-18-79	M	45	AFRICAN	EPILEPSY	NEUROLOGY	EMERGENCY	Convulsions with aspiration pneumonia	23	0.01	2	0.0268	Survived	Full Code	2	3	None	Home
159-73-47	M	82	AFRICAN	DM,CKD,UNKNOWN MALIGNANCY	SEPSIS	EMERGENCY	Septic shock	94	0.92	6	0.8399	Death	DNR	6	7	NIV	Home
046-75-13	F	67	ASIAN	DM,HTN	CARDIOLOGY	EMERGENCY	Pulmonary edema	34	0.02	2	0.0604	Survived	Full Code	3	6	None	Home
054-95-01	M	89	ASIAN	HTN,BPH,GERD	SEPSIS	EMERGENCY	Severe sepsis	49	0.05	2	0.1351	Survived	Full Code	3	3	None	Home
156-84-20	M	25	ASIAN	NONE	INFECTIOUS	EMERGENCY	Dengue fever with severe thrombocytopenia	27	0.02	2	0.0126	Survived	Full Code	2	3	None	Home
156-74-44	M	54	AFRICAN	HTN,HF	SURGERY	EMERGENCY	Necrotising fascitis	53	0.22	4	0.2082	Survived	Full Code	30	32	INOTROPES,MECHANICAL VENTILATION	Home
156-80-44	F	71	ASIAN	DM,HTN,CAD,HF,STROKE	NEUROLOGY	EMERGENCY	Post stroke seizures	47	0.17	4	0.2364	Survived	Full Code	2	3	None	Home
049-43-46	M	70	AFRICAN	DM,HTN,STROKE	NEUROLOGY	EMERGENCY	CVA - Ischemic with convulsions	39	0.02	3	0.1053	Survived	Full Code	5	8	None	Home
047-47-45	F	52	AFRICAN	DM,HTN,CKD	NEPHROLOGY	EMERGENCY	Pulmonary edema	51	0.19	5	0.2533	Survived	Full Code	4	6	INOTROPES,NIV	Home
156-92-06	M	77	AFRICAN	DM	ENDOCRINOLOGY	EMERGENCY	Urosepsis, Polyarthritis	45	0.15	2	0.0864	Survived	Full Code	4	10	None	Home
156-08-05	M	88	ASIAN	HTN,COPD,HF,CHRONIC A Fib	RESPIRATORY	EMERGENCY	COPD Exacerbation	75	0.87	6	0.87	Death	DNR	2	2	NIV	Home
036-78-34	M	76	ASIAN	HTN	GASTROENTEROLOGY	EMERGENCY	Bleeding diverticulum&Internal hemorrhoids	41	0.03	3	0.1518	Survived	Full Code	3	7	None	Home
156-77-25	F	79	ASIAN	HTN,CKD,HYPOTHYROIDISM	GASTROENTEROLOGY	EMERGENCY	Acute abdomen	45	0.16	4	0.289	Survived	Full Code	23	34	HEMODIALYSIS	Home
156-84-80	M	42	AFRICAN	DM,HTN	GASTROENTEROLOGY	EMERGENCY	Acute cholecystitis	50	0.16	4	0.1575	Survived	Full Code	1	13	None	Home
156-93-77	M	21	CAUCASIAN	DM	ENDOCRINOLOGY	EMERGENCY	DKA	28	0.01	2	0.0381	Survived	Full Code	12	14	None	Home
041-44-20	M	86	AFRICAN	HIV,EX-TB	INFECTIOUS	EMERGENCY	IRIS 2 Newly IDS	49	0.06	3	0.163	Survived	Full Code	4	11	HEMODIALYSIS	Home
156-88-69	M	46	AFRICAN	HTN	NEUROLOGY	EMERGENCY	CVA - Hemorrhagic	44	0.04	4	0.0429	Survived	Full Code	3	3	None	Home
052-98-80	F	48	AFRICAN	DM	ENDOCRINOLOGY	EMERGENCY	DKA	30	0.01	2	0.03	Survived	Full Code	2	4	None	Home
051-39-90	F	55	ASIAN	Major Depressive Disorder	NEUROLOGY	EMERGENCY	Drug overdose/intoxication	27	0.01	2	0.0419	Survived	Full Code	2	3	None	Home
052-28-12	M	72	CAUCASIAN	COPD	NEUROLOGY	EMERGENCY	CVA - Ischemic (with Hemorrhagic tranformation)	52	0.28	4	0.3528	Survived	Full Code	14	14	None	Home
156-94-64	M	69	CAUCASIAN	HTN,CHRONIC A Fib	NEUROLOGY	EMERGENCY	CVA - Ischemic (with Hemorrhagic tranformation)	59	0.15	4	0.1774	Survived	Full Code	6	13	None	Home
155-70-57	F	70	AFRICAN	DM,HTN,HIV,	INFECTIOUS	EMERGENCY	Atypical Pneumonia	45	0.06	3	0.1435	Survived	Full Code	2	5	None	Home
157-02-93	F	62	AFRICAN	DM,HTN,CKD,CAD,PVD	CARDIOLOGY	EMERGENCY	Pulmonary edema 2 Acute decompansated HF	50	0.16	4	0.2073	Survived	Full Code	2	2	HEMODIALYSIS	Home
121-11-46	F	31	ASIAN	NONE	INFECTIOUS	EMERGENCY	Septic shock 2 Severe Malaria	27	0.1104	4	0.0359	Survived	Full Code	7	11	None	Home
010-58-11	F	53	AFRICAN	BREAST CA	ONCOLOGY	EMERGENCY	Lower GI bleeding 2 Colon mets	44	0.06	5	0.1892	Survived	DNR	1	4	None	Home
012-83-98	F	88	ASIAN	DM,HTN,HYPOTHYROIDISM	INFECTIOUS	EMERGENCY	Urosepsis	45	0.08	2	0.1263	Survived	Full Code	1	3	None	Home
157-01-02	M	23	AFRICAN	NONE	NEUROLOGY	EMERGENCY	Moderate TBI (Right Intraventricular Hemorrhage)	44	0.05	4	0.0188	Survived	Full Code	12	14	None	Home
156-94-69	F	49	AFRICAN	DM,HIV,PCP,PTB,STROKE	NEUROLOGY	EMERGENCY	Viral encephalitis	60	0.88	6	0.8856	Death	Full Code	15	15	INOTROPES,MECHANICAL VENTILATION	Home	EVD insertion
005-74-69	F	89	ASIAN	DM,HTN,CKD,HF	SEPSIS	EMERGENCY	Septic shock	63	0.69	5	0.8577	Death	DNR	4	4	INOTROPES	Home
045-58-04	F	26	AFRICAN	HODGKIN'S LYMPHOMA	SEPSIS	EMERGENCY	Septic shock	45	0.06	4	0.0759	Survived	Full Code	5	7	None	Home
020-47-49	F	81	ASIAN	DM,ANXIETY DISORDER	RESPIRATORY	EMERGENCY	Pulmonary embolism	42	0.05	2	0.0994	Survived	Full Code	4	5	None	Home
053-61-02	F	48	ASIAN	NONE	NEUROLOGY	EMERGENCY	Mild TBI with Epidural Hematoma	34	0.05	3	0.0993	Survived	Full Code	2	9	None	Home
155-02-24	F	75	ASIAN	HTN,IHD,ASTHMA	CARDIOLOGY	EMERGENCY	Asthma exacerbation	69	0.6	5	0.7459	Death	DNR	2	2	NIV	Home
156-65-09	F	81	AFRICAN	DM,HTN,HF,BREAST CANCER	RESPIRATORY	EMERGENCY	Pneumonia with ARDS	62	0.38	3	0.1677	Survived	Full Code	2	4	None	Home
099-24-09	M	78	ASIAN	NONE	INFECTIOUS	EMERGENCY	Sepsis 20 Severe Malaria	61	0.5	3	0.7199	Death	DNR	6	6	NIV	Home
038-16-07	M	77	ASIAN	DM,HTN,CKD	ENDOCRINOLOGY	EMERGENCY	Rebound Hypoglycemia	54	0.19	3	0.2772	survived	Full Code	3	5	None	Home
157-14-24	F	38	AFRICAN	NONE	NEUROLOGY	EMERGENCY	TB Menigitis	29	0.02	3	0.0697	Survived	Full Code	1	8	None	Home
157-18-74	M	61	AFRICAN	DM	ENDOCRINOLOGY	EMERGENCY	DKA	68	0.82	7	0.8888	Death	Full Code	1	1	INOTROPES,MECHANICAL VENTILATION	Home
049-79-64	M	69	AFRICAN	DM,HTN,HF,CKD,CHRONIC A Fib	NEPHROLOGY	EMERGENCY	Acute decompansated HF, AKI	68	0.57	7	0.7882	Death	Full Code	6	6	INOTROPES,NIV	Home
007-48-63	M	63	ASIAN	DM,HTN,CKD,HF	NEPHROLOGY	EMERGENCY	AKI on CKD	49	0.12	4	0.1856	Survived	Full Code	7	7	None	Home
054-76-62	F	81	AFRICAN	NONE	INFECTIOUS	EMERGENCY	Urosepsis	45	0.36	3	0.1677	Death	DNR	13	13	None	Home
157-11-77	M	22	AFRICAN	NONE	SURGERY	EMERGENCY	Acute appendicitis	26	0.01	2	0.0117	Survived	Full Code	3	8	None	Home	Appendectomy
156-99-71	M	30	AFRICAN	HEPATOCELLULAR CARCINOMA	ONCOLOGY	EMERGENCY	Brain metastasis	60	0.4	5	0.5688	Death	DNR	7	7	MECHANICAL VENTILATION	Home
053-52-88	M	66	AFRICAN	HF,CAD	CARDIOLOGY	EMERGENCY	Acute decompansated HF,AKI	53	0.32	4	0.3012	Survived	Full Code	19	23	INOTROPES	Home	BKA
041-40-84	F	34	AFRICAN	HIV	HEMATOLOGY	EMERGENCY	TTP	43	0.2	4	0.1846	Death	Full Code	1	1	NIV	Home
013-54-51	M	77	ASIAN	HTN,HF,COPD	RESPIRATORY	EMERGENCY	UGIB, COPD Exacerbation	48	0.2	3	0.3112	Survived	DNR	11	11	None	Home
014-45-47	F	61	ASIAN	BREAST CA	ONCOLOGY	EMERGENCY	Lung metastasis	69	0.34	4	0.4813	Survived	DNR	7	12	INOTROPES	Home
155-78-28	M	71	ASIAN	COLON CA	SURGERY	EMERGENCY	Lower GI bleeding 20 Colon CA	49	0.07	3	0.1601	Survived	Full Code	6	11	None	Home	Tumor excision
157-06-15	M	39	ASIAN	NONE	SURGERY	EMERGENCY	Acute appendicitis	30	0.01	2	0.0222	Survived	Full Code	1	4	None	Home	Appendectomy
157-33-28	M	51	ASIAN	HTN	NEUROLOGY	EMERGENCY	CVA - Hemorrhagic	63	0.66	7	0.8007	Death	Full Code	103	103	INOTROPES,MECHANICAL VENTILATION	Home
053-13-43	F	77	ASIAN	HYPOTHYROIDISM, LIVER CIRHOSIS	GASTROENTEROLOGY	EMERGENCY	Esopheageal varices	66	0.38	5	0.3898	Death	DNR	5	5	INOTROPES,NIV	Home	OGD
145-14-40	F	72	AFRICAN	HTN	NEUROLOGY	EMERGENCY	HTN Encephalopathy	42	0.03	3	0.1089	Survived	Full Code	2	3	None	Home
135-50-61	M	46	AFRICAN	HTN	CARDIOLOGY	EMERGENCY	Dilated Cardiomyopathy	42	0.05	5	0.1423	Survived	Full Code	2	4	None	Home
157-36-09	M	37	AFRICAN	Liver Cirhosis	GASTROENTEROLOGY	EMERGENCY	Esophageal varices	42	0.08	4	0.1149	Survived	Full Code	3	5	None	Home	Band ligation
035-34-05	F	82	AFRICAN	DM,HTN,CKD	NEUROLOGY	EMERGENCY	CVA - Ischemic	79	0.64	5	0.4264	Survived	Full Code	3	8	None	Home
054-99-94	M	53	AFRICAN	HTN	NEUROLOGY	EMERGENCY	CVA - Hemorrhagic	48	0.06	4	0.1348	Survived	Full Code	2	2	None	Home
157-12-62	M	70	AFRICAN	DM,HTN,LIVER Cirhosis	ONCOLOGY	EMERGENCY	Lung metastasis	81	0.72	5	0.8205	Death	DNR	7	8	None	Home
048-91-77	M	63	ASIAN	HTN,CAD,BPH,PUD	GASTROENTEROLOGY	EMERGENCY	Bleeding PUD	39	0.03	3	0.0481	Survived	Full Code	2	3	None	Home
035-49-61	M	39	AFRICAN	COLON CA	ONCOLOGY	WARD	Bleeding Colon	27	0.02	3	0.1192	Survived	Full Code	1	6	None	Home	Palliative Surgical Colectomy
157-35-46	M	68	AFRICAN	NONE	CARDIOLOGY	EMERGENCY	Pulmonary embolism	22	0.01	2	0.0222	Survived	Full Code	3	6	None	Home
011-27-47	M	73	CAUCASIAN	CAD,ASTHMA	RESPIRATORY	EMERGENCY	Asthma exacerbation	54	0.2	4	0.3313	Survived	Full Code	6	6	None	Home
157-34-97	F	77	AFRICAN	NONE	GASTROENTEROLOGY	EMERGENCY	Ascending Cholangitis	67	0.57	3	0.3578	Survived	Full Code	17	30	None	Home
040-45-24	M	72	AFRICAN	DM,HTN,PUD	GASTROENTEROLOGY	EMERGENCY	Bleeding PUD	34	0.02	3	0.0777	Survived	Full Code	2	3	None	Home
157-28-19	M	72	AFRICAN	HTN,CKD	GASTROENTEROLOGY	EMERGENCY	Acute abdomen (obstructed hernia)	60	0.42	4	0.6103	Death	DNR	2	2	MECHANICAL VENTILATION	Home
	M	71	AFRICAN	NONE	SEPSIS	EMERGENCY	Septic shock	40	0.06	3	0.1684	Survived	Full Code	7	7	INOTROPES	Home	Surgical Debridement
157-39-74	F	45	AFRICAN	Liver Cirhosis	GASTROENTEROLOGY	EMERGENCY	Bleeding Esophageal varices	31	0.02	3	0.0237	Survived	Full Code	2	4	None	Home	OGD
009-16-70	M	50	AFRICAN	HTN,IHD,HIV-IV,TB	RESPIRATORY	EMERGENCY	Pulmonary edema	64	0.2	5	0.232	Survived	Full Code	2	2	NIV,HEMODIALYSIS	Home
053-88-22	M	75	AFRICAN	DM,HTN,HF	CARDIOLOGY	EMERGENCY	Hypertensive urgency	42	0.05	2	0.0805	Survived	Full Code	4	6	None	Home
012-40-25	F	40	CAUCASIAN	ANKOLYSING SPONDILITIS	SEPSIS	EMERGENCY	Septic shock 20 Severe Malaria	39	0.46	5	0.5934	Death	Full Code	2	2	INOTROPES,MECHANICAL VENTILATION	Home
115-26-52	F	51	AFRICAN	HIV	INFECTIOUS	EMERGENCY	PTB,PCP	40	0.05	3	0.0772	Survived	Full code	6	7	None	Home
051-96-20	M	37	ASIAN	NONE	INFECTIOUS	EMERGENCY	Severe Malaria	32	0.03	2	0.0198	Survived	Full code	2	3	None	Home
155-95-93	M	24	ASIAN	NONE	INFECTIOUS	EMERGENCY	Severe Malaria	34	0.06	3	0.0298	Survived	Full code	3	4	None	Home
157-46-07	M	65	ASIAN	HF,CKD	NEPHROLOGY	CLINIC	AKI on CKD	53	0.15	5	0.2621	Survived	Full code	3	3	None	Home
013-10-12	M	82	AFRICAN	HTN,PARKISONS,CAD	GASTROENTEROLOGY	EMERGENCY	Obstructive jaundice	55	0.19	3	0.2166	Survived	Full code	1	4	None	Home	ERCP
157-37-08	M	24	ASIAN	NONE	INFECTIOUS	EMERGENCY	Severe Malaria	31	0.06	3	0.0298	Survived	Full code	9	12	None	Home
063-41-95	M	29	AFRICAN	NONE	RESPIRATORY	EMERGENCY	Pulmonary embolism	27	0.01	3	0.0333	Survived	Full Code	5	8	None	Home
036-54-86	F	82	ASIAN	DM,HTN	INFECTIOUS	EMERGENCY	Septic Shock - CAP	36	0.07	2	0.1065	Survived	Full Code	4	9	INOTROPES	Home
157-44-82	M	27	AFRICAN	Liver Cirhosis	GASTROENTEROLOGY	EMERGENCY	Bleeding Esophageal varices	24	0.01	3	0.0115	Survived	Full Code	2	5	None	Home	Band ligation
156-70-90	M	38	ASIAN	ASTHMA	CARDIOLOGY	EMERGENCY	ACS- NSTEMI	23	0	2	0.0206	Survived	Full Code	2	2	None	Home
157-36-76	M	63	ASIAN	HTN	NEUROLOGY	EMERGENCY	CVA - Ischemic	39	0.05	4	0.1617	Survived	Full Code	3	6	None	Home
157-42-88	M	16	ASIAN	NONE	INFECTIOUS	EMERGENCY	Severe Malaria	34	0.01	3	0.0238	Survived	Full Code	3	4	NIV	Home
046-80-06	M	53	AFRICAN	HTN,CKD,HF,LIVER CIRRHOSIS	CARDIOLOGY	EMERGENCY	Acute Decomensated HF	50	0.17	5	0.2981	Survived	Full Code	1	8	INOTROPES	Home
050-78-05	M	62	AFRICAN	HIV	SEPSIS	EMERGENCY	Septic Shock - CAP	52	0.34	4	0.281	Survived	Full Code	14	16	INOTROPES	Home
052-21-18	F	32	AFRICAN	GESTATION DM	ENDOCRINOLOGY	EMERGENCY	DKA	23	0	2	0.0152	Survived	Full Code	3	4	None	Home
157-55-58	F	71	AFRICAN	DM,HTN,CKD,HF	CARDIOLOGY	EMERGENCY	Acute Decomensated HF	57	0.44	7	0.5739	Survived	Full Code	12	12	INOTROPES,HEMODIALYSIS	Home
058-39-44	M	71	CAUCASIAN	HIV,Chronic A Fib	RESPIRATORY	EMERGENCY	CAP	60	0.11	5	0.2405	Survived	Full Code	3	4	None	Home
157-52-39	F	67	AFRICAN	DM,HTN	RESPIRATORY	EMERGENCY	CAP	51	0.03	3	0.0604	Survived	Full Code	2	2	None	Home
157-39-75	F	58	ASIAN	Liver Cirhosis	GASTROENTEROLOGY	EMERGENCY	Hepatic Encephalopathy	83	0.67	7	0.7295	Death	DNR	18	18	None	Home
045-36-23	F	87	ASIAN	HTN,ASTHMA	RESPIRATORY	EMERGENCY	Asthma exacerbation	46	0.08	2	0.1263	Survived	Full Code	4	7	None	Home
157-64-21	F	85	ASIAN	DM,HTN,HF	CARDIOLOGY	EMERGENCY	Acute Decomensated HF	39	0.3	2	0.2233	Survived	Full Code	4	6	NIV	Home
157-46-07	M	65	ASIAN	HTN,HF	CARDIOLOGY	WARD	Acute Decomensated HF	53	0.22	4	0.297	Survived	Full Code	6	8	INOTROPES,HEMODIALYSIS	Home
017-33-00	M	61	ASIAN	HTN,HF, CKD,liver Cirhosis	NEPHROLOGY	EMERGENCY	AKI ON CKD	71	0.69	5	0.8029	Death	full Code	11	11	INOTROPES,MECHANICAL VENTILATION,HEMODIALYSIS	Home
157-62-14	M	44	CAUCASIAN	NONE	INFECTIOUS	EMERGENCY	Severe Malaria	49	0.3	5	0.7099	Survived	Full Code	4	9	MECHANICAL VENTILATION, HEMODIALYSIS	Home
157-57-72	M	46	ASIAN	NONE	SURGERY	EMERGENCY	Moderate TBI	29	0.02	2	0.0289	Survived	Full Code	5	8	MECHANICAL VENTILATION	Home	Wrist Debridement ana ORIF
157-74-00	M	33	ASIAN	NONE	ENDOCRINOLOGY	EMERGENCY	Hypokalemic Thyrotoxic Periodic Paralysis	28	0.01	2	0.0177	Survived	Full code	1	2	None	Home
157-72-99M	M	63	ASIAN	COPD	INFECTIOUS	EMERGENCY	Severe Malaria	44	0.1	3	0.1134	Survived	Full code	2	3	None	Home
046-03-26	M	76	ASIAN	COPD	RESPIRATORY	EMERGENCY	COPD Exacerbation	51	0.05	3	0.1743	Survived	Full code	6	8	NIV	Home
052-98-19	F	28	AFRICAN	NONE	OBGYN	WARD	Post Partum Hemorrhage	29	0.01	2	0.0146	Survived	Full Code	1	3	None	Home
157-83-18	M	67	AFRICAN	HTN,HF,PVD	CARDIOLOGY	EMERGENCY	Acute Decomensated HF	48	0.09	4	0.27	Survived	Full Code	6	7	INOTROPES,NIV	Home
157-54-64	F	19	ASIAN	NONE	RESPIRATORY	EMERGENCY	Endobroncheal TB	37	0.02	3	0.0104	Survived	Full Code	2	4	None	Home	Bronchoscopy
157-84-31	F	51	AFRICAN	NONE	NEUROLOGY	EMERGENCY	CVA - Ischemic	30	0.01	3	0.0516	Survived	Full Code	1	7	None	Home	TEE
157-76-76	M	33	ASIAN	NONE	SURGERY	EMERGENCY	L1,L2 Fracture with Cord Compression	25	0	2	0.0177	Survived	Full Code	2	2	None	Home
157-81-74	F	64	ASIAN	HTN,HF,STROKE,HYPOTHYROIDISM	NEUROLOGY	EMERGENCY	CVA - Ischemic	46	0.2	4	0.2122	Survived	Full Code	6	11	INOTROPES	Home
052-87-81	F	56	AFRICAN	DM,HTN,CKD	NEPHROLOGY	EMERGENCY	Hypertesnive Encheloapthy	34	0.03	4	0.1434	Survived	Full Code	1	3	None	Home
157-41-57	F	61	AFRICAN	CERVICAL CA	ONCOLOGY	EMERGENCY	Lung metastasis	55	0.17	3	0.4813	Survived	DNR	1	7	None	Home	Bilateral Nephrostomy and Pyelography
040-19-64	M	48	AFRICAN	DM,HTN,CKD	CARDIOLOGY	EMERGENCY	HTN Emergency	42	0.02	4	0.1133	Survived	Full Code	3	4	HEMODIALYSIS	Home
157-07-68	M	78	ASIAN	HTN, A- FIB, CVA	NEUROLOGY	EMERGENCY	CVA - Ischemic	52	0.15	2	0.2548	Death	DNR	4	8	None	Home
156-57-30	M	89	ASIAN	DM,CAD,PUD	GASTROENTEROLOGY	EMERGENCY	Bleeding PUD	69	0.66	6	0.8843	Death	Full Code	9	10	None	Home	Ex-Lap
157-82-42	F	46	AFRICAN	HIV	INFECTIOUS	EMERGENCY	PCP	41	0.05	2	0.0278	Survived	Full Code	4	5	None	Home
042-18-42	M	90	AFRICAN	DM,HF,CKD,DEMENTIA	ENDOCRINOLOGY	EMERGENCY	Refractory Hypoglycemia	58	0.24	4	0.4015	Survived	Full Code	7	8	HEMODIALYSIS	Home
000-20-58	F	45	AFRICAN	ASTHMA,HTN,BREAST CA	ONCOLOGY	CLINIC	Lung metastasis	50	0.11	3	0.1417	Survived	Full Code	1	2	None	Home
035-15-00	M	46	ASIAN	NONE	GASTROENTEROLOGY	EMERGENCY	Acute Gastroenteritis, AKI, Electrolyte Imbalance	43	0.04	3	0.0623	Survived	Full Code	3	6	None	Home
036-26-27	F	49	AFRICAN	HIV,CKD	INFECTIOUS	EMERGENCY	Meningitis	49	0.42	6	0.4553	Survived	DNR	21	21	INOTROPES,MECHANICAL VENTILATION,HEMODIALYSIS	Home	Tracheostomy
040-75-30	M	39	ASIAN	NONE	SURGERY	EMERGENCY	Pituitary adenoma	31	0.03	2	0.0695	Survived	Full Code	3	8	None	Home
157-93-93	M	50	AFRICAN	DM,HTN,PUD	ENDOCRINOLOGY	EMERGENCY	DKA	28	0.01	2	0.0335	Survived	Full Code	4	6	None	Home
068-22-71	M	39	ASIAN	SCHIZOPHRENIA	ENDOCRINOLOGY	EMERGENCY	Severe Hyponatremia	27	0	2	0.0222	Survived	Full Code	2	2	None	Home	OGD
157-96-08	F	58	ASIAN	DM,HTN	NEUROLOGY	EMERGENCY	CVA - Hemorraghic	50	0.19	6	0.2788	Survived	Full Code	7	7	MECHANICAL VENTILATION	Home
156-65-09	F	81	AFRICAN	DM,HTN,BREAST CA	ONCOLOGY	EMERGENCY	Lung metastasis	57	0.13	3	0.1677	Survived	Full Code	1	4	None	Home
047-64-14	F	47	AFRICAN	HIV,HTN,ASTHMA	INFECTIOUS	EMERGENCY	PCP	41	0.02	2	0.03	Survived	Full Code	1	8	None	Home
019-12-24	F	80	AFRICAN	DM,HTN,SPONDYLOSIS	ENDOCRINOLOGY	EMERGENCY	NEUROGLYCOPENIA	55	0.38	5	0.3983	Survived	Full Code	10	14	None	Home
018-88-23	F	45	AFRICAN	HIV	INFECTIOUS	EMERGENCY	PCP	47	0.06	3	0.109	Survived	Full Code	6	7	INOTROPES	Home
041-58-22	M	50	AFRICAN	DM,HTN,PUD	GASTROENTEROLOGY	EMERGENCY	Bleeding PUD	26	0.01	3	0.0286	Survived	Full Code	3	4	None	Home	Colonoscopy + OGD
157-93-42	M	59	CAUCASIAN	NONE	INFECTIOUS	EMERGENCY	Severe Malaria	37	0.07	3	0.0988	Survived	Full Code	3	5	None	Home
045-81-84	F	58	AFRICAN	HTN	NEUROLOGY	EMERGENCY	Amyotrophic Lateral Sclerosis	37	0.19	5	0.2935	Survived	Full Code	16	16	INOTROPES,MECHANICAL VENTILATION	Home	Tracheostomy
157-99-91	M	87	ASIAN	DM,HTN,HF,CKD,COPD	RESPIRATORY	EMERGENCY	COPD Exacerbation	59	0.19	4	0.3651	Survived	Full Code	5	7	None	Home
048-60-76	M	35	AFRICAN	NONE	SURGERY	EMERGENCY	Mild TBI with Tension Pneumothorax	30	0.01	2	0.0191	Survived	Full Code	11	12	None	Home	Left leg Surgical Debridement (Necrotising fascitis)
157-99-44	M	83	AFRICAN	HTN, HF, PARKINSON	CARDIOLOGY	EMERGENCY	Aortic Dissection, CVA - Ischemic	49	0.26	6	0.5394	Death	Full Code	2	2	None	Hospital
157-88-34	F	56	AFRICAN	HTN	NEUROLOGY	EMERGENCY	CVA - Hemorrhagic	43	0.08	3	0.14	Survived	Full Code	1	13	None	Home
043-27-33	F	77	ASIAN	HTN,NARROW ANGLE GLAUCOMA,HYPOTHYROIDISM,EPILEPSY	ENDOCRINOLOGY	EMERGENCY	Severe hyponatremia	42	0.05	2	0.0895	Survived	Full Code	2	3	None	Home
157-93-54	M	80	ASIAN	HTN,HF,CAD,Chronic A Fib	CARDIOLOGY	EMERGENCY	Acute Decomensated HF	38	0.15	5	0.3182	Survived	Full Code	11	11	None	Home
006-66-53	M	48	AFRICAN	NONE	NEUROLOGY	EMERGENCY	CVA - Hemorraghic	40	0.1	4	0.1227	Survived	Full Code	7	11	None	Home
158-16-51	M	63	ASIAN	HTN	SURGERY	EMERGENCY	Perforated Diverticulitis	43	0.05	2	0.1137	Survived	Full Code	2	6	None	Hospital
054-81-68	M	75	ASIAN	CKD, CHRONIC LYMPHOID LEUKEMIA	INFECTIOUS	EMERGENCY	Septic shock secondary to Lower limb Cellulitis	59	0.84	7	0.9521	Death	DNR	4	5	INOTROPES,NIV	Home
052-61-80	F	62	ASIAN	HTN,HF	CARDIOLOGY	EMERGENCY	Acute Decomensated HF	42	0.05	2	0.0523	Survived	Full Code	4	7	None	Home
158-10-21	M	53	ASIAN	NONE	INFECTIOUS	WARD	LL DVT, CAP, Pulmonary Septic Embolism	32	0.01	2	0.0375	Survived	Full Code	3	27	None	Home
156-35-99	M	58	AFRICAN	HIV,PROSTATE CA	ONCOLOGY	EMERGENCY	Sepsis 20 Mets	46	0.07	3	0.2159	Survived	DNR	5	5	None	Home
158-15-24	M	37	ASIAN	NONE	CARDIOLOGY	EMERGENCY	Cardiogenic shock	21	0.15	4	0.2208	Survived	Full Code	6	6	INOTROPES,MECHANICAL VENTILATION	Home
045-83-91	M	65	ASIAN	DM,HTN,CKD,HF,LIVER CIRHOSIS	SEPSIS	EMERGENCY	Septic shock 20 CAP, Cellulitis	51	0.2	2	0.2416	Death	DNR	2	2	None	Home
158-06-83	F	25	AFRICAN	SICKLE CELL DISEASE	HEMATOLOGY	EMERGENCY	CVA - Ischemic	36	0.02	3	0.0443	Survived	Full Code	7	12	None	Home
155-29-09	F	71	ASIAN	DM,HTN,HF,CKD,CHRONIC A Fib	CARDIOLOGY	EMERGENCY	Acute Decomensated HF	58	0.19	6	0.2578	Survived	Full Code	4	5	INOTROPES,HEMODIALYSIS	Home
046-12-68	M	71	AFRICAN	DM,HTN,CKD,MULTIPLE MYELOMA	INFECTIOUS	EMERGENCY	Septic shock secondary to Neutropenic Fever	59	0.36	6	0.4495	Survived	Full Code	7	12	INOTROPES	Home
158-13-37	M	35	ASIAN	NONE	INFECTIOUS	EMERGENCY	Severe Malaria	26	0.01	2	0.0191	Survived	Full Code	2	3	None	Home
037-32-41	M	51	AFRICAN	DM,HTN	SURGERY	EMERGENCY	Bleeding Diverticulum	26	0.01	3	0.0348	Survived	Full Code	4	5	None	Home
042-25-87	F	64	AFRICAN	HTN	RESPIRATORY	EMERGENCY	Pulmonary embolism	32	0.01	2	0.0562	Survived	Full Code	1	3	None	Home
002-81-18	F	44	AFRICAN	DM	ENDOCRINOLOGY	EMERGENCY	DKA	32	0.03	2	0.0268	Survived	Full Code	3	4	None	Home
034-53-70	M	49	AFRICAN	HF,RHEUMATIC HEART DISEASE	CARDIOLOGY	EMERGENCY	Acute Decomensated HF	33	0.02	2	0.0311	Survived	Full Code	6	6	INOTROPES,NIV	Home
158-08-78	F	90	ASIAN	NONE	INFECTIOUS	EMERGENCY	Severe Malaria	58	0.44	2	0.4551	Death	DNR	9	9	INOTROPES,NIV	Home
013-45-79	F	66	ASIAN	DM,HTN,CKD,CAD	NEPHROLOGY	EMERGENCY	Acute Decomensated HF	50	0.1	4	0.2038	Survived	Full Code	4	5	None	Home
156-13-20	M	40	AFRICAN	NONE	NEUROLOGY	EMERGENCY	Moderate TBI	45	0.08	4	0.1053	Survived	Full Code	4	5	None	Home
158-10-80	F	44	CAUCASIAN	NONE	SURGERY	WARD	Perforated Appenditicis	36	0.02	2	0.0258	Survived	Full Code	1	2	None	Home	Ex - Lap with Appendectomy
157-72-68	F	59	ASIAN	DM,HTN,CKD	SURGERY	EMERGENCY	Septic shock seonadry to Septic Stump.	39	0.03	4	0.1634	Survived	Full Code	4	14	INOTROPES	Home	Surgical Debridement
009-75-63	M	46	AFRICAN	DM,HTN	SURGERY	WARD	Appendicular Abscess	27	0.01	2	0.0289	Survived	Full Code	3	5	None	Home	Ex - Lap with Appendectomy
158-18-14	F	52	ASIAN	NONE	NEUROLOGY	EMERGENCY	Subarachnoid Hemorrhage	55	0.19	5	0.2575	Survived	Full Code	3	3	INOTROPES,MECHANICAL VENTILATION	Home	EVD insertion
158-33-03	M	34	ASIAN	NONE	INFECTIOUS	EMERGENCY	Severe Malaria	31	0.01	2	0.0184	Survived	Full Code	3	4	None	Home
047-11-41	M	34	AFRICAN	PUD	GASTROENTEROLOGY	EMERGENCY	Bleeding PUD	28	0.01	3	0.0156	Survived	Full Code	3	4	None	Home
158-27-82	M	54	AFRICAN	DVT,FACTOR V LEIDEN	HEMATOLOGY	EMERGENCY	CAP with distress	60	0.22	5	0.3733	Death	Full Code	4	5	INOTROPES,MECHANICAL VENTILATION	Home
046-48-50	M	70	CAUCASIAN	BLADDER CA	ONCOLOGY	EMERGENCY	Intestinal metastasis	68	0.81	8	0.8914	Death	DNR	9	13	INOTROPES,MECHANICAL VENTILATION,HEMODIALYSIS	Home	Ex - Lap with Colostomy, Hemicolectomy
158-21-18	M	68	AFRICAN	HTN,HF,STROKE	RESPIRATORY	EMERGENCY	CAP	48	0.16	4	0.1924	Survived	Full Code	2	2	NIV	Home
058-42-43	F	90	ASIAN	HTN,HF,Chronic A fib	RESPIRATORY	EMERGENCY	CAP	55	0.2	4	0.1878	Survived	Full Code	3	7	None	Home
158-45-34	M	56	ASIAN	DM,HTN,CKD	NEPHROLOGY	EMERGENCY	Severe Hyponatremia	29	0.01	4	0.0891	Survived	Full Code	2	3	None	Home
158-48-31	M	40	ASIAN	NONE	ENDOCRINOLOGY	EMERGENCY	Acute Decomensated HF	23	0	2	0.0321	Survived	Full Code	1	2	None	Home
158-35-47	F	73	ASIAN	ASTHMA,HTN,HF	CARDIOLOGY	EMERGENCY	Severe Preeclampsia	51	0.02	2	0.0777	Survived	Full Code	4	6	None	Home
049-53-92	F	33	AFRICAN	DM,HTN	OBSTETRICS & GYNECOLOGY	EMERGENCY	Pulmonary embolism	18	0.01	2	0.0177	Survived	Full Code	4	8	None	Home
038-84-82	F	43	AFRICAN	DM,HTN	CARDIOLOGY	EMERGENCY	COPD Exacerbation	63	0.66	9	0.938	Death	Full Code	1	1	INOTROPES,MECHANICAL VENTILATION	Home
043-61-25	F	77	ASIAN	HTN,COPD	RESPIRATORY	EMERGENCY	Septic Shock - CAP	43	0.05	2	0.0927	Survived	Full Code	5	9	NIV	Home
059-57-02	M	62	AFRICAN	DM,HIV,CKD,HIV	INFECTIOUS	EMERGENCY	Severe Malaria	64	0.57	6	0.6213	Survived	Full Code	4	4	INOTROPES, NIV	Home
033-93-70	M	56	AFRICAN	PUD	CARDIOLOGY	EMERGENCY	Acute Decomensated HF	38	0.06	3	0.1046	Survived	Full Code	1	3	None	Home
157-93-54	M	70	ASIAN	HTN,HF,CAD,Chronic A Fib	INFECTIOUS	EMERGENCY	Severe Malaria	48	0.12	4	0.2921	Survived	Full Code	11	11	None	Home
158-37-28	M	38	ASIAN	NONE	OBSTETRICS & GYNECOLOGY	EMERGENCY	Severe Pre-eclampsia	35	0.01	2	0.0214	Survived	Full Code	5	9	None	Home
044-98-00	F	46	AFRICAN	NONE	SURGERY	WARD	Perforated PUD	27	0.02	3	0.0198	Survived	Full Code	1	4	None	Home
158-43-17	M	21	ASIAN	NONE	RESPIRATORY	EMERGENCY	CAP	33	0.01	4	0.0335	Survived	Full Code	2	3	None	Home
003-05-08	F	65	AFRICAN	DM	INFECTIOUS	EMERGENCY	PTB,PCP	37	0.02	2	0.0583	Survived	Full Code	2	2	None	Home
158-38-08	M	46	AFRICAN	HIV	RESPIRATORY	EMERGENCY	COPD Exacerbation	36	0.06	2	0.0289	Survived	Full Code	4	4	None	Home
046-61-74	M	74	ASIAN	HTN,HF,COPD,ASTHMA	RESPIRATORY	EMERGENCY	Anemia 20 Bone metastasis	44	0.1	3	0.1688	Survived	Full Code	2	5	NIV	Home
012-59-22	M	75	AFRICAN	DM,HTN,CKD,PROSTATE CA	ONCOLOGY	WARD	CAP	85	0.88	10	0.9739	Death	Full Code	1	2	INOTROPES,MECHANICAL VENTILATION	Home
158-70-15	M	70	ASIAN	DM,HTN,HF,IHD,CAD,COPD	RESPIRATORY	EMERGENCY	Disseminated Esophageal CA	47	0.07	3	0.1486	Survived	Full Code	3	4	None	Hospital (LAMA)	Bronchoscopy
056-00-16	F	55	ASIAN	ESOPHAGEAL CA	NEUROLOGY	EMERGENCY	Guillain-Barre Syndrome	47	0.26	4	0.5416	Death	DNR	2	8	None	Home
158-68-09	M	26	CAUCASIAN	NONE	HEMATOLOGY	EMERGENCY	Aplastic Anemia	30	0.01	2	0.0136	Survived	Full Code	2	7	None	Home	Open Gastotomy + Feeding tube Plcement
158-67-44	M	59	AFRICAN	NONE	CARDIOLOGY	EMERGENCY	HTN Emergency	36	0.03	2	0.0486	Survived	Full Code	6	13	None	Home	BMA + Trephine Biopsy
054-40-53	F	30	AFRICAN	HTN	OBSTETRICS & GYNECOLOGY	EMERGENCY	Post Partum Hemorrhage	26	0.01	2	0.0158	Survived	Full Code	1	2	None	Home
007-08-64	F	35	AFRICAN	HTN	NEUROLOGY	EMERGENCY	Guillain-Barre Syndrome	46	0.08	3	0.0964	Survived	Full Code	6	9	None	Home	Subtotal Hysterectomy
041-62-59	F	46	AFRICAN	NONE	SEPSIS	EMERGENCY	Septic Shock - Urine	30	0.01	2	0.0289	Survived	Full Code	3	13	None	Home
017-15-33	F	77	ASIAN	DM,HTNCKD,PUD	SEPSIS	EMERGENCY	Septic Shock - Aspiration Pneumonia	40	0.06	3	0.1491	Survived	Full Code	2	2	INOTROPES	Home
011-04-20	F	82	ASIAN	CLL	SURGERY	EMERGENCY	Acute Pancreatitis	59	0.46	3	0.3112	Death	DNR	13	13	None	Home
049-83-05	M	37	AFRICAN	NONE	RESPIRATORY	EMERGENCY	Pulmonary Embolism	21	0.01	2	0.0206	Survived	Full Code	2	9	None	Home
156-73-68	M	60	AFRICAN	DM,HTN,CKD,DVT	NEUROLOGY	EMERGENCY	CVA - Hemorraghic	50	0.24	3	0.3106	Death	Full Code	5	10	INOTROPES	Home
158-58-65	M	33	AFRICAN	HTN	GASTROENTEROLOGY	EMERGENCY	Bleeding Esophageal varices	38	0.04	4	0.0918	Survived	Full Code	2	9	None	Home
158-60-49	M	37	ASIAN	ESOPHAGEAL VARICES	SURGERY	EMERGENCY	Severe TBI	34	0.02	4	0.0175	Survived	Full Code	4	4	None	Home
158-57-46	M	27	AFRICAN	NONE	SEPSIS	EMERGENCY	Septic Shock - CAP	45	0.54	6	0.7439	Death	Full Code	2	2	INOTROPES,MECHANICAL VENTILATION	Home	Craniotomy with Epidural Hematoma Evacuation
038-18-87	F	39	AFRICAN	HTN,HIV	SURGERY	EMERGENCY	Severe TBI	50	0.44	5	0.5631	Death	Full Code	5	7	INOTROPES,MECHANICAL VENTILATION	Home
158-69-71	M	38	ASIAN	DM	SURGERY	EMERGENCY	Myocardial Infarction	70	0.42	7	0.6491	Survived	Full Code	8	13	None	Home
033-42-83	M	52	ASIAN	HTN,CAD	NEPHROLOGY	EMERGENCY	AKI on CKD	28	0.01	2	0.0484	Survived	Full Code	1	3	None	Home	PCI
054-95-74	M	50	AFRICAN	DM,HTN,CKD	SEPSIS	EMERGENCY	Septic Shock - Urine	41	0.04	4	0.1213	Survived	Full Code	8	17	HEMODIALYSIS	Home
012-92-77	M	76	ASIAN	DM,HTN,STROKE	NEUROLOGY	EMERGENCY	CVA - Hemorraghic	38	0.05	3	0.1248	Survived	Full Code	2	3	INOTROPES	Home
053-00-66	F	33	AFRICAN	NONE	SEPSIS	EMERGENCY	Septic Shock - CAP	49	0.24	7	0.4276	Survived	Full Code	1	1	INOTROPES,MECHANICAL VENTILATION	Home (Transeferred to MNH)	EVD insertion
051-70-40	F	66	AFRICAN	NONE	SURGERY	EMERGENCY	Burn Injury	43	0.05	3	0.1363	Survived	Full Code	5	7	INOTROPES	Home
158-57-33	M	28	AFRICAN	NONE	RESPIRATORY	EMERGENCY	Pulmonary TB	36	0.02	2	0.0361	Survived	Full Code	1	2	None	Home	Wound Dressing
034-23-27	M	37	AFRICAN	NONE	GASTROENTEROLOGY	EMERGENCY	Bleeding Esophageal varices	33	0.01	2	0.0206	Survived	Full Code	6	8	None	Home	Flexible Bronchoscopy
015-80-80	M	64	ASIAN	DM,HTN,CKD,Liver Cirhosis	NEUROLOGY	EMERGENCY	CVA - Hemorrhagic	56	0.2	5	0.3165	Death	Full Code	13	13	INOTROPES,MECHANICAL VENTILATION,	Home
158-99-34	M	35	ASIAN	BUCAL CA	ONCOLOGY	EMERGENCY	Lung metastasis	50	0.46	6	0.5944	Survived	Full Code	24	25	INOTROPES,MECHANICAL VENTILATION	Home
038-43-71	F	48	AFRICAN	BREAST CA,HTN	NEUROLOGY	EMERGENCY	CVA - Hemorrhagic	44	0.11	3	0.1444	Survived	Full Code	1	4	None	Home	Chest Tube Drainage
140-43-58	M	28	AFRICAN	HTN	NEUROLOGY	EMERGENCY	CVA - Ischemic	35	0.04	4	0.0849	Survived	Full Code	10	13	None	Hospital
053-73-64	M	54	AFRICAN	HTN, DM	NEUROLOGY	EMERGENCY	CVA - Ischemic	32	0.01	4	0.059	Survived	FUll Code	5	7	None	Home
